# Supplementary material for: Maternal Region of Origin and Small for Gestational Age: A Cross-sectional Analysis of Victorian Perinatal Data.
Source: Research Square preprint supplement (doi:10.21203/rs.3.rs-275454/v1), 2021-03-11
Supplement: Supplementary file 1 [file 0c7d8663d110e4658c92b86b.docx]

**Supplementary Tables 1 and 2**

**Table 1.**

*Unadjusted characteristics of the study population (n = 708,475) stratified maternal region of origin.*

|  | **Australia**  **n =461 903 (64.7%)** | | | | **Europe, Oceania, Americas**  **n =64 195 (9.1%)** | | | **North East, North Africa, Middle East**  **n =55 737 (7.9%)** | | | **South East, South Central Asia,**  **Sub-Saharan Africa**  **n = 126 640 (17.9%)** | |
| --- | --- | --- | --- | --- | --- | --- | --- | --- | --- | --- | --- | --- |
|  | **N (%)** | | | | **N (%)** | | | **N (%)** | | | **N (%)** | |
| **Birthweight** |  | | | |  | | |  | | |  | |
| <10th Centile | 33 749 (7.3) | | | | 4, 565 (7.1) | | | 5, 563 (10.0) | | | 17,687 (14.0) | |
| >10th Centile | 428, 154 (92.7) | | | | 59, 630 (92.9) | | | 50,174 (90.0) | | | 108,953 (86.0) | |
| **Sex - Baby** |  | | | |  | | |  | | |  | |
| Male | 235,529 (51.0) | | | | 32,731 (51.0) | | | 28,648 (51.4) | | | 64,855 (51.2) | |
| Female | 226,374 (49.0) | | | | 31,464 (49.0) | | | 27,089 (48.6) | | | 61,785 (48.8) | |
| **Gestational Age Grouped** | | | |  | | |  | | |  | |
| Preterm < 37 weeks | 63,312 (13.7) | | | | 7,937 (12.4) | | | 6,334 (11.4) | | | 18,631 (14.7) | |
| Term > 37 weeks | 398,591 (86.3) | | | | 56,258 (87.6) | | | 49,403 (88.6) | | | 108, 009 (85.3) | |
| **Maternal SEIFA** | |  | |  | | |  | | |  | |
| Advantage | 179, 694 (41.6) | | | | 28,856 (47.4) | | | 20,896 (39.3) | | | 36,838 (30.6) | |
| Average | 89,356 (20.7) | | | | 11,662 (19.2) | | | 9,766 (18.3) | | | 22,247 (18.5) | |
| Disadvantage | 162,815 (37.7) | | | | 20,334 (33.4) | | | 22,571 (42.4) | | | 61,351 (50.9) | |
| **Age group** |  | | | |  | | |  | | |  | |
| < 20 | 11,703 (2.5) | | | | 715 (1.1) | | | 503 (0.9) | | | 633 (0.5) | |
| 20-35 | 358,684 (77.7) | | | | 46,251 (72.1) | | | 44,953 (80.7) | | | 106,213 (83.9) | |
| 35+ | 91,311 (19.8) | | | | 17,201 (26.8) | | | 10,274 (18.4) | | | 19,776 (15.6) | |
| **Relationship Status** | |  | |  | | |  | | |  | |
| In a Relationship | 388,233 (85.4) | | | | 57,582 (90.6) | | | 51,882 (93.7) | | | 119,071 (94.5) | |
| Not in a relationship | 66,453 (14.6) | | | | 5,977 (9.4) | | | 3,492 (6.3) | | | 6,935 (5.5) | |
| **Parity** |  | | | |  | | |  | | |  | |
| Multiparous | 263,087 (57.0) | | | | 36,532 (56.9) | | | 30,998 (55.6) | | | 67,209 (53.1) | |
| Nulliparous | 198, 771 (43.0) | | | | 27,651 (43.1) | | | 24,734 (44.4) | | | 59, 412 (46.9) | |
| **BMI** |  | | | |  | | |  | | |  | |
| < 18.5 | 12,653 (2.9) | | | | 1,684 (2.8) | | | 1,663 (3.2) | | | 4,092 (3.5) | |
| 18.5 – 24.99 | 215,510 (50.2) | | | | 29,777 (50.1) | | | 26,570 (51.6) | | | 61,130 (52.1) | |
| > 25 | 201,141 (46.9) | | | | 27,962 (47.1) | | | 23,278 (45.2) | | | 52,187 (44.4) | |
| **Height** |  | | | |  | | |  | | |  | |
| < 25th Centile | 57,707 (12.5) | | | | 7,552 (11.8) | | | 10,784 (19.3) | | | 50,767 (40.1) | |
| 25th to 75 Centile | 200,224 (43.3) | | | | 27,443 (42.7) | | | 30,507 (54.7) | | | 58,389 (46.1) | |
| > 75th Centile | 203,972 (44.2) | | | | 29,200 (45.5) | | | 14,446 (25.9) | | | 17,484 (13.8) | |
| **Smoking before 20wks** | |  | |  | | |  | | |  | |
| Smoker | 60,786 (13.4) | | | | 6,131 (9.7) | | | 1,490 (2.7) | | | 1,698 (1.3) | |
| Non-Smoker | 393,058 (86.6) | | | | 57,072 (90.3) | | | 53,622 (97.3) | | | 124,250 (98.7) | |
| **Smoking after 20wks** | |  | |  | | |  | | |  | |
| Smoker | 32,872 (8.5) | | | | 2,928 (5.3) | | | 613 (1.2) | | | 573 (0.5) | |
| Non-Smoker | 352,354 (91.5) | | | | 52,777 (94.7) | | | 50,486 (98.8) | | | 115,802 (99.5) | |
| **Gestational Age 1st visit** | | | |  | | |  | | |  | |
| Before 11 weeks | 222,760 (48.8) | | | | 25,999 (40.9) | | | 21,824 (39.5) | | | 43,607 (34.7) | |
| 12 to 23 weeks | 202,110 (44.2) | | | | 31,327 (49.3) | | | 28,276 (51.2) | | | 70,659 (56.2) | |
| After 23 weeks/no care | 31,976 (7.0) | | | | 6,169 (9.7) | | | 5,139 (9.3) | | | 11,353 (9.0) | |
| **Type 1 Diabetes** | |  | |  | | |  | | |  | |
| Yes | 1,863 (0.4) | | | | 185 (0.3) | | | 90 (0.2) | | | 451 (0.4) | |
| No | 460,040 (99.6) | | | | 64,010 (99.7) | | | 55,647 (99.8) | | | 126,189 (99.6) | |
| **Type 2 Diabetes** | |  | |  | | |  | | |  | |
| Yes | 717 (0.2) | | | | 162 (0.3) | | | 150 (0.3) | | | 636 (0.5) | |
| No | 461,186 (99.8) | | | | 64,033 (99.7) | | | 55,737 (99.7) | | | 126,004 (99.5) | |
| **Pre-existing hypertension** | | | |  | | |  | | |  | |
| Yes | 6,039 (1.3) | | | | 706 (1.1) | | | 344 (0.6) | | | 1,162 (0.9) | |
| No | 455,864 (98.7) | | | | 63,489 (98.9) | | | 55,393 (99.4) | | | 125,478 (99.1) | |
| **Suspected Fetal Growth Restriction** | | |  | | |  | | |
| Yes | 19,766 (4.3) | | | | 2,430 (3.8) | | | 3,156 (5.7) | | | 8,681 (6.9) | |
| No | 442,137 (95.7) | | | | 61,765 (96.2) | | | 52,581 (94.3) | | | 117,959 (93.1) | |
| **Gestational Diabetes -Diet** | | | |  | | |  | | |  | |
| Yes | 18,506 (4.0) | | | | 3,326 (5.2) | | | 5,379 (9.7) | | | 14,728 (11.6) | |
| No | 443,397 (96.0) | | | | 60,869 (94.8) | | | 50,358 (90.3) | | | 111,912 (88.4) | |
| **Gestational Diabetes - Insulin** | | | |  | | |  | | |  | |
| Yes | 12,769 (2.8) | | | | 2,78 (3.4) | | | 2,835 (5.1) | | | 9,906 (7.8) | |
| No | 449,134 (97.2) | | | | 62,017 (96.6) | | | 52,902 (94.9) | | | 116,734 (92.2) | |
| **Pre-Eclampsia** | |  | |  | | |  | | |  | |
| Yes | 10,332 (2.2) | | | | 1,236 (1.9) | | | 590 (1.1) | | | 2,211 (1.7) | |
| No | 451,571 (97.8) | | | | 62,959 (98.1) | | | 55,147 (98.9) | | | 124,429 (98.3) | |
| **HELLP Syndrome** | |  | |  | | |  | | |  | |
| Yes | 732 (0.2) | | | | 106 (0.2) | | | 58 (0.1) | | | 214 (0.2) | |
| No | 461,171 (99.8) | | | | 64,089 (99.8) | | | 55,579 (99.9) | | | 126,640 (99.8) | |

*Note*: 1. N (%): Number and percentage. 2. BMI, Body Mass Index. 3. Suspected FGR: Suspected fetal growth restriction. 4. HELLP: Haemolysis, Elevated Liver Enzymes and Low Platelet Count. 5. SEIFA, Socioeconomic Indexes for Areas

**Table 2.**

*Bivariate analysis of the study population characteristics (n = 708,475) stratified Australian born and migrant Australian.*

| **Demographics** |  | **Australian Born**  **N (%)** | **Migrant Australian**  **N (%)** | ***p -*value** |
| --- | --- | --- | --- | --- |
| **Birthweight** | <10th Centile | 33,749 (7.3) | 27,815 (11.3) | <0.001 |
|  | >10th Centile | 428,154 (92.7) | 218,757 (88.7) |
| **Sex- Baby** | Female | 226,374 (49.0) | 120,338 (48.8) | = 0.101 |
|  | Male | 235,529 (51.0) | 126,234 (51.2) |
| **Gestational Age Grouped** | Preterm < 37 weeks | 63,312 (13.7) | 32,902 (13.3) | <0.001 |
|  | Term > 37 weeks | 398,591 (86.3) | 213,670 (86.7) |
| **Marital Status** | In a Relationship | 388,233 (85.4) | 228,535 (93.3) | <0.001 |
|  | Not in a Relationship | 66,435 (14.6) | 16,404 (6.7) |
| **Age Group (years)** | < 20 | 11,703 (2.5) | 1,851 (0.8) |  |
|  | 20 to 35 | 358,684 (77.7) | 197,417 (80.1) | < 0.001 |
|  | 35+ | 91,311 (19.8) | 47,251 (19.2) |  |
| **Parity** | Primiparous | 198,771 (43.0) | 111,797 (45.3) | <0.001 |
|  | Multiparous | 263,087 (57.0) | 134,739 (54.7) |
| **Maternal SEIFA** | Advantaged | 179,694 (41.6) | 86,590 (36.9) |  |
|  | Average | 89,356 (20.7) | 43,675 (18.6) | < 0.001 |
|  | Disadvantage | 162,815 (37.7) | 104,256 (44.5) |  |
| **Maternal Health & Health Behaviours** | |  |  |  |
| **BMI** | Underweight | 12,653 (2.9) | 7,439 (3.3) |  |
|  | Healthy Weight | 215,510 (50.2) | 117,477 (51.4) | <0.001 |
|  | Overweight | 201,141 (46.9) | 103,427 (45.3) |  |
| **Height** | Tall | 203,972 (44.2) | 61,130 (24.8) |  |
|  | Average | 200,224 (43.3) | 116,339 (47.2) | <0.001 |
|  | Short | 57,707 (12.5) | 69,103 (28.0) |  |
| **Smoking before 20wks** | Yes | 60,786 (13.4) | 9,319 (3.8) | < 0.001 |
|  | No | 393,058 (86.6) | 234,944 (96.2) |
| **Smoking after 20wks.** | Yes | 32,872 (8.5) | 4,124 (1.9) | < 0.001 |
|  | No | 352, 352 (91.5) | 218,492 (98.1) |
| **Gestational Age at 1st Visit** | Before 11 weeks | 222,760 (48.8) | 91,430 (37.4) |  |
|  | 12 to 23 weeks | 202,110 (44.2) | 130,262 (53.3) | < 0.001 |
|  | 24 weeks /no care | 31,976 (7.0) | 22,661 (9.3) |  |
| **Maternal Medical and Pregnancy Conditions** | | |  |  |
| **Type 1 Diabetes** | Yes | 1,863 (0.4) | 726 (0.3) | < 0.001 |
|  | No | 460,040 (99.6) | 245,846 (99.7) |
| **Pre-existing Hypertension** | Yes | 6,039 (1.3) | 2,212 (0.9) | < 0.001 |
|  | No | 45,864 (98.7) | 244,360 (99.1) |
| **Gestational Diabetes - Diet** | Yes | 18,506 (4.0) | 23,433 (9.5) | < 0.001 |
|  | No | 443,397 (96.0) | 223,139 (90.5) |
| **Gestational Diabetes -Insulin** | Yes | 12,769 (2.8) | 14,919 (6.1) | < 0.001 |
|  | No | 449,134 (97.2) | 231,653 (93.9) |
| **Preeclampsia** | Yes | 10,332 (2.2) | 4,037 (1.6) | < 0.001 |
|  | No | 451,571 (97.8) | 242,535 (98.4) |
| **HELLP Syndrome** | Yes | 732 (0.2) | 378 (0.2) | < 0.001 |
|  | No | 461,171 (99.8) | 246,194 (99.8) |
| **Suspected FGR** | Yes | 19,766 (4.3) | 14,267 (5.8) | < 0.001 |
|  | No | 442,137 (95.7) | 232,305 (94.2) |

*Note*: 1. Chi square test for independence. 2. N (%): Number and percentage. 3. BMI, Body Mass Index. 4. Suspected FGR: Suspected fetal growth restriction. 5. HELLP: Haemolysis, Elevated Liver Enzymes and Low Platelet Count. 6. SEIFA, Socioeconomic Indexes for Areas.
